# Supplementary material for: The Pseudomonas aeruginosa RpoH (σ32) Regulon and Its Role in Essential Cellular Functions, Starvation Survival, and Antibiotic Tolerance
Source: MDPI journal article supplement (doi:10.3390/ijms24021513), 2023-01-12
Supplement: s1 [file s1]

S1A.

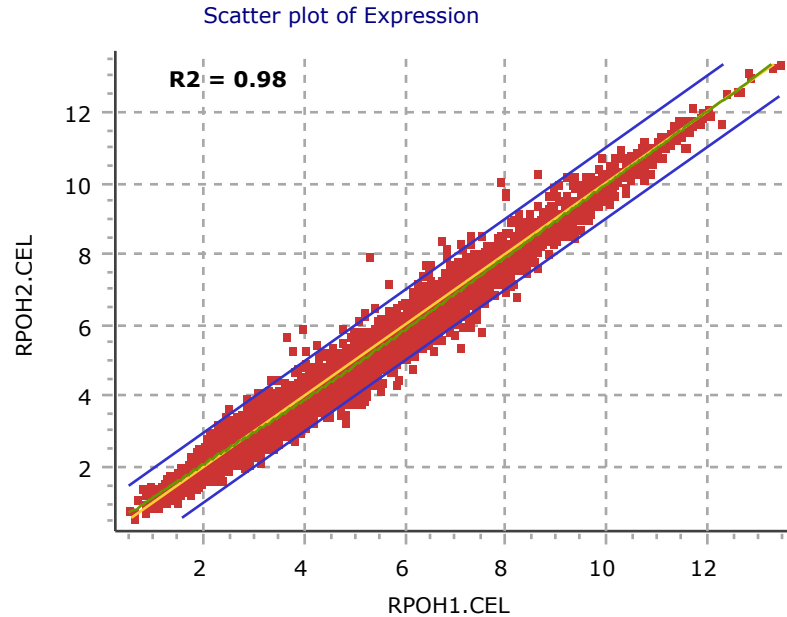

S1B.

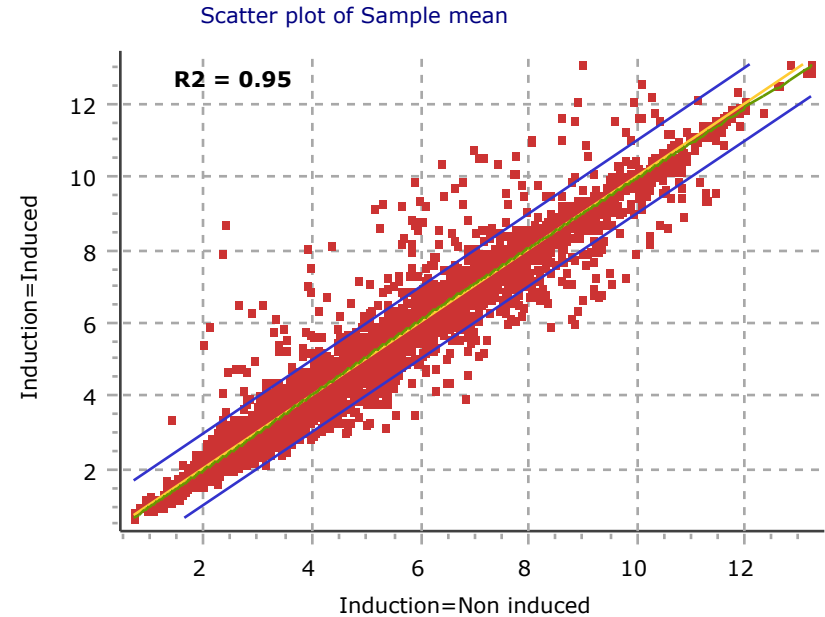

**Figure S1.** Scatter plots of *P. aeruginosa*  $\Delta rpoH$  ( $P_{BAD}-rpoH$ ) transcriptome expression data. (A) Independent biological replicates showed highly reproducible gene expression values;  $R^2 = 0.98$  in the example above. (B) Arabinose induction of *rpoH* resulted in 258 genes with significantly different expression (at  $p < 0.05$  and  $> two-fold$  change) compared to the non-induced controls. Three independent biological replicates were performed.





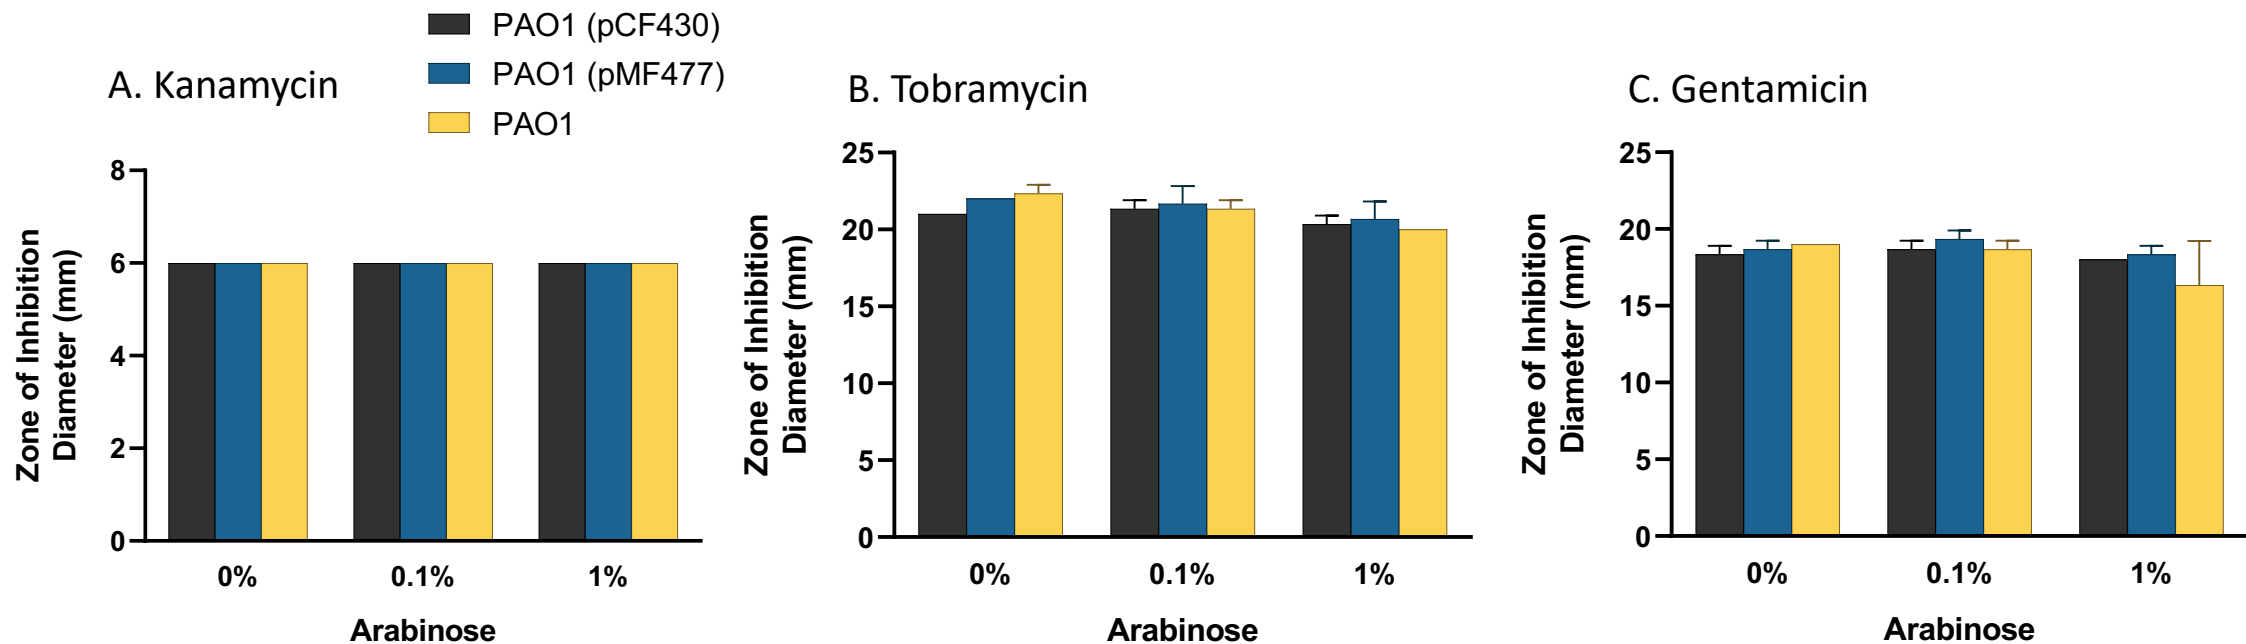

**Figure S4.** Antibiotic sensitivities of *P. aeruginosa* PAO1, *P. aeruginosa* PAO1 (pCF430), and *P. aeruginosa* PAO1 (pMF477) assayed by the disk diffusion assay, to determine the effect of plasmids used in this study on antibiotic tolerance of *P. aeruginosa*. The results show the mean and standard deviation of three independent biological replicates. The results show no effects on the zone of clearing around the aminoglycoside disks due to the plasmids used in this study.

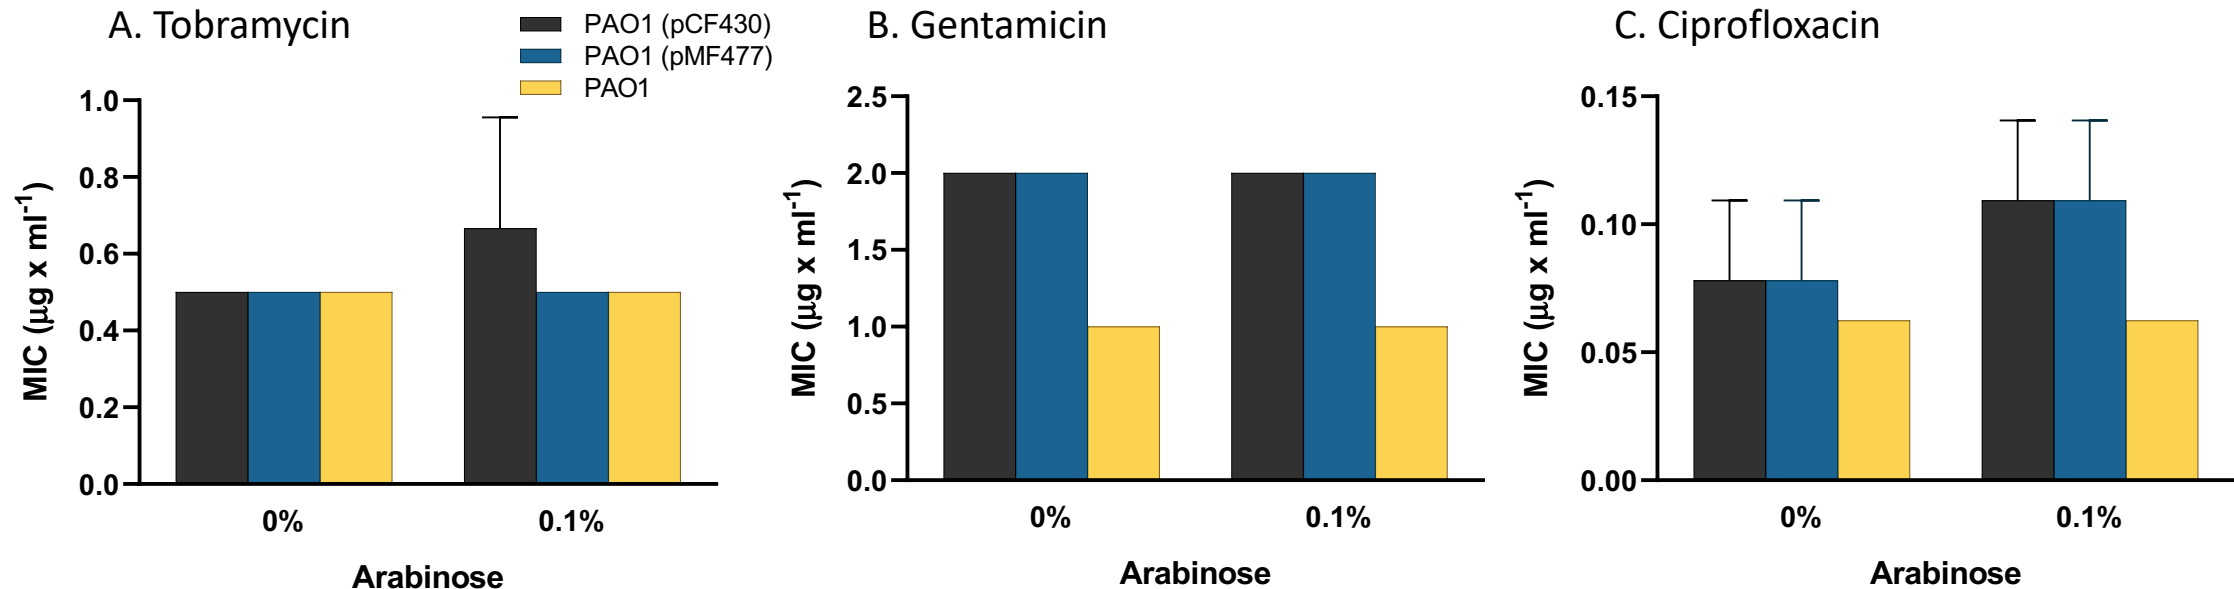

**Figure S5.** Antibiotic sensitivities of *P. aeruginosa* PAO1, *P. aeruginosa* PAO1 (pCF430), and *P. aeruginosa* PAO1 (pMF477) assayed as minimum inhibitory concentration (MIC), to determine the effect of plasmids used in this study on antibiotic tolerance of *P. aeruginosa*. The results show the mean and standard deviation of three independent biological replicates. The results show that the vector control and the plasmid containing *rpoH* (pMF477) resulted in an increased MIC to gentamicin, but no significant effect on the MIC to tobramycin or ciprofloxacin.

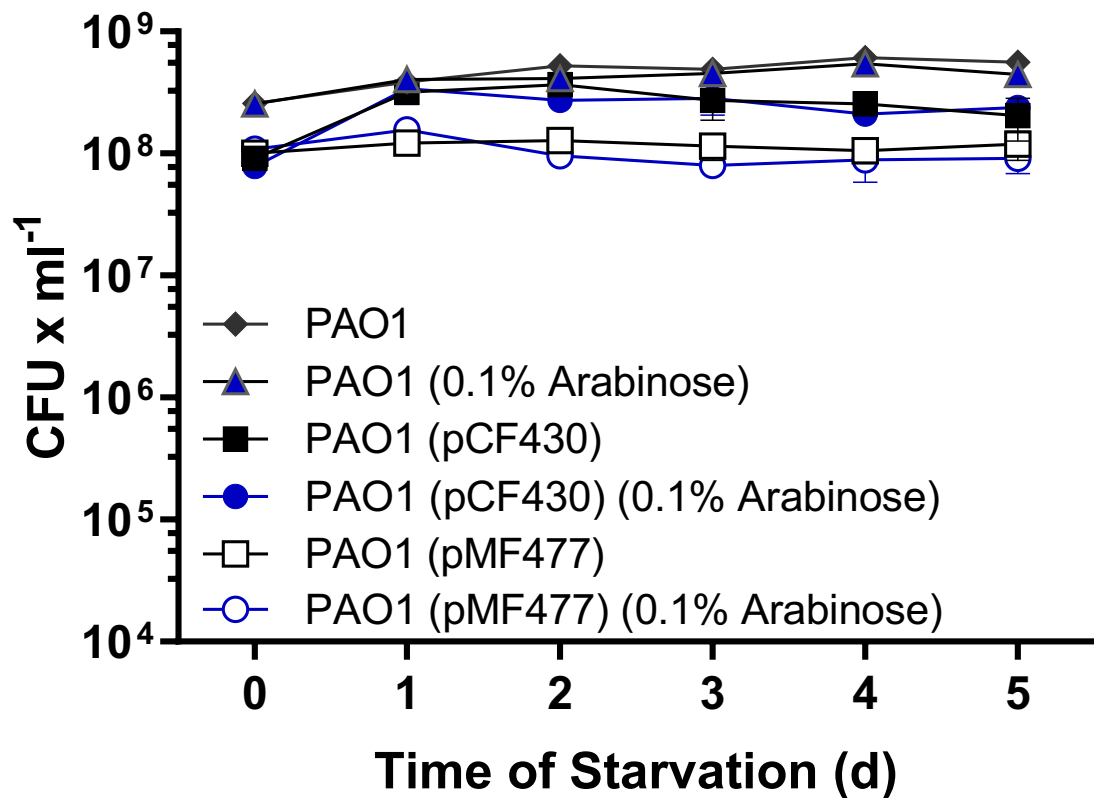

**Figure S6.** Effect of nutrient limitation on the viability of *P. aeruginosa* and *P. aeruginosa* (pCF430) and *P. aeruginosa* (pMF477), to determine the effect of the plasmids used in this study on survival of *P. aeruginosa* during starvation. Following growth to early stationary phase, cells were incubated in phosphate buffered saline with or without arabinose as indicated, for up to 5 days. The viability of the cells was determined as colony forming units. The results show no effect of the plasmids on the survival of *P. aeruginosa* during starvation, in the presence or absence of arabinose.

**Table S1.** Primers used in this study.

**Gene amplification primers**

|              |                                  |
|--------------|----------------------------------|
| RpoH Nhe 5'  | CAGCTAGCGAGTTTCGTGAATCGGAGGATTCG |
| RpoH Hind 3' | GCAAGCTTGCGGGGTGCGGTTTTCGCG      |

**Allelic exchange primers**

|                      |                                                  |
|----------------------|--------------------------------------------------|
| RpoH HindIII 5' Up   | aaGCTTCGTCTTCGGCCTGACCATC                        |
| RpoH T7 Up R Acc     | ctatagtgagtcgtattaggtaccGCGAATCCTCCGATTCACGAAAC. |
| RpoH HindIII 3' Down | aagcTTGCGGATAGACCCAGGCCTCGC                      |
| RpoH T7 Down F Acc   | ggtacctaatacgactcactatagTCGCCGCGCCTCGCGAAAACCGC. |

**RT-qPCR primers**

|                   |                       |                  |
|-------------------|-----------------------|------------------|
| acpLeftRT-PCR2    | ACTCGGCGTGAAGGAAGAAG  | Williamson, 2012 |
| acpRightRT-PCR2   | CGACGGTGTCAAGGGAGT    |                  |
| PA4463-For (hpf)  | GCCATTTGACAAGATCACC   | Williamson, 2012 |
| PA4463-Rev (hpf)  | GCTGCCGTTTCGAGATACTTC |                  |
| PA3126-For (lbpA) | CTGTTCCGTCATTCCGTAGG  | Williamson, 2012 |
| PA3126-Rev (lbpA) | GGCGATAACGATGCGATACT  |                  |
| RpoH_F            | CCGAACGCCTCTTCTATCAG  |                  |
| RpoH_R            | TTGGCGATATGAACAACGAA  |                  |
| GroES_1F          | GAGGAAGAGACCAAGACCGC  |                  |
| GroES_1R          | GTCCAGTACACGACCGGTAC  |                  |
| PA1216_F          | GACGACACCCTGGAGATCAT  |                  |
| PA1216_R          | GCTGGTGGAGAGGAAGAACA  |                  |
| WapP_F            | AGCCGCTGGTGTATTTTCATC |                  |
| WapP_R            | GTGGTACTTGCCACCTTGT   |                  |

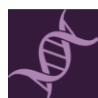

**Table S2.** Genes significantly downregulated in PAO1 $\Delta$ *rpoH* ( $P_{BAD-rpoH}$ ) by > 2-fold change and  $p < 0.05$  following a 15-minute induction of *rpoH*.

| Gene   | Function                                                         | Fold change | <i>p</i> -value      |
|--------|------------------------------------------------------------------|-------------|----------------------|
| PA0035 | Tryptophan synthase alpha chain                                  | -2.2        | $1.3 \times 10^{-2}$ |
| PA0179 | Two-component response regulator                                 | -2.0        | $2.6 \times 10^{-2}$ |
| PA0423 | Antibiotic sequester PasP                                        | -2.4        | $2.0 \times 10^{-3}$ |
| PA0460 | hypothetical protein                                             | -2.0        | $1.1 \times 10^{-2}$ |
| PA0470 | Ferrichrome receptor FiuA                                        | -2.1        | $2.3 \times 10^{-2}$ |
| PA0484 | Similar to glycine cleavage system transcriptional repressor     | -2.6        | $1.3 \times 10^{-3}$ |
| PA0567 | Conserved hypothetical protein                                   | -2.4        | $3.6 \times 10^{-3}$ |
| PA0586 | Conserved hypothetical protein                                   | -2.2        | $3.5 \times 10^{-2}$ |
| PA0587 | Contains a von Willebrand domain                                 | -2.3        | $4.2 \times 10^{-2}$ |
| PA0588 | Possible response regulator                                      | -2.1        | $1.1 \times 10^{-3}$ |
| PA0672 | Heme oxygenase                                                   | -2.7        | $1.7 \times 10^{-2}$ |
| PA0707 | Transcriptional regulator ToxR                                   | -3.4        | $3.1 \times 10^{-3}$ |
| PA0792 | Propionate catabolic protein PrpD                                | -2.4        | $1.8 \times 10^{-3}$ |
| PA0798 | Phospholipid methyltransferase                                   | -2.1        | $1.4 \times 10^{-2}$ |
| PA0931 | Ferric enterobactin receptor PirA                                | -2.2        | $2.1 \times 10^{-2}$ |
| PA1041 | Outer membrane protein precursor                                 | -3.3        | $4.7 \times 10^{-4}$ |
| PA1134 | Hypothetical protein                                             | -4.4        | $1.9 \times 10^{-2}$ |
| PA1245 | Alkaline protease secretion protein AprX                         | -2.6        | $7.4 \times 10^{-4}$ |
| PA1246 | Alkaline protease secretion protein AprD                         | -2.3        | $1.2 \times 10^{-2}$ |
| PA1300 | ECF sigma factor HxuI                                            | -2.6        | $1.6 \times 10^{-2}$ |
| PA1301 | Anti-sigma factor HxuR                                           | -2.1        | $1.2 \times 10^{-2}$ |
| PA1650 | Transporter                                                      | -2.3        | $1.4 \times 10^{-3}$ |
| PA1713 | Transcriptional regulator ExsA                                   | -5.2        | $2.8 \times 10^{-3}$ |
| PA1745 | Hypothetical protein                                             | -2.0        | $1.8 \times 10^{-2}$ |
| PA1753 | ATP binding/hydrolysis                                           | -2.1        | $1.5 \times 10^{-2}$ |
| PA1860 | SAM-dependent methyltransferase                                  | -2.8        | $1.7 \times 10^{-3}$ |
| PA1871 | LasA protease precursor                                          | -2.0        | $1.4 \times 10^{-2}$ |
| PA1888 | Putative esterase/lipase                                         | -3.1        | $4.0 \times 10^{-2}$ |
| PA1911 | Sigma factor regulator, FemR                                     | -2.7        | $2.4 \times 10^{-2}$ |
| PA2033 | Siderophore-interacting FAD oxydoreductase                       | -3.1        | $5.8 \times 10^{-3}$ |
| PA2034 | SAM-dependent methyltransferase                                  | -3.8        | $6.7 \times 10^{-3}$ |
| PA2062 | Pyridoxal-phosphate dependent enzyme                             | -2.5        | $2.2 \times 10^{-2}$ |
| PA2174 | Hypothetical protein                                             | -2.6        | $3.4 \times 10^{-2}$ |
| PA2204 | Putative binding component of ABC transporter                    | -3.0        | $2.7 \times 10^{-2}$ |
| PA2259 | Transcriptional regulator PtxS                                   | -2.0        | $3.5 \times 10^{-4}$ |
| PA2364 | Lip3, a membrane bound component of the type VI secretion system | -2.9        | $2.2 \times 10^{-3}$ |
| PA2365 | HsiB3, type VI secretion system                                  | -4.2        | $8.9 \times 10^{-3}$ |



|        |                                                                |      |                      |
|--------|----------------------------------------------------------------|------|----------------------|
| PA2366 | HsiC3, type VI secretion system                                | -4.1 | $4.3 \times 10^{-3}$ |
| PA2367 | Hcp3, type VI secretion system                                 | -4.3 | $3.1 \times 10^{-2}$ |
| PA2368 | HsiF3, type VI secretion system                                | -4.8 | $6.9 \times 10^{-3}$ |
| PA2369 | HsiG3, type VI secretion system                                | -2.1 | $2.2 \times 10^{-2}$ |
| PA2370 | HsiH3, type VI secretion system                                | -2.2 | $1.8 \times 10^{-2}$ |
| PA2371 | ClpA/B-type protease                                           | -2.4 | $1.1 \times 10^{-2}$ |
| PA2372 | Hypothetical protein                                           | -3.4 | $1.5 \times 10^{-2}$ |
| PA2373 | VgrG3, Phage base V domain-containing protein, type 6SS        | -2.5 | $2.5 \times 10^{-2}$ |
| PA2375 | Hypothetical protein                                           | -2.3 | $4.6 \times 10^{-2}$ |
| PA2383 | Transcriptional regulator                                      | -2.8 | $4.8 \times 10^{-3}$ |
| PA2384 | Fur-like DNA binding domain                                    | -3.8 | $8.0 \times 10^{-4}$ |
| PA2385 | 3-oxo-C12-homoserine lactone acylase PvdQ                      | -5.1 | $1.4 \times 10^{-3}$ |
| PA2386 | L-ornithine N5-oxygenase                                       | -3.7 | $1.6 \times 10^{-3}$ |
| PA2389 | PvdR                                                           | -3.9 | $7.0 \times 10^{-3}$ |
| PA2390 | PvdT                                                           | -5.5 | $3.1 \times 10^{-4}$ |
| PA2391 | Outer membrane protein precursor                               | -3.1 | $2.9 \times 10^{-2}$ |
| PA2392 | PvdP                                                           | -5.5 | $2.6 \times 10^{-4}$ |
| PA2393 | Putative dipeptidase                                           | -5.8 | $1.2 \times 10^{-2}$ |
| PA2394 | PvdN                                                           | -5.8 | $2.3 \times 10^{-3}$ |
| PA2395 | PvdO                                                           | -5.5 | $1.3 \times 10^{-3}$ |
| PA2396 | Pyoverdine synthetase F                                        | -3.8 | $2.5 \times 10^{-4}$ |
| PA2397 | Pyoverdine biosynthesis protein PvdE                           | -4.8 | $2.9 \times 10^{-2}$ |
| PA2398 | Ferripyoverdine receptor                                       | -3.6 | $4.3 \times 10^{-2}$ |
| PA2399 | Pyoverdine synthetase D                                        | -2.2 | $1.4 \times 10^{-2}$ |
| PA2400 | PvdJ, a nonribosomal peptide synthetase condensation module    | -2.4 | $4.4 \times 10^{-3}$ |
| PA2401 | PvdJ, fused with previous                                      | -2.9 | $8.0 \times 10^{-3}$ |
| PA2402 | Pyoverdine peptide synthetase                                  | -4.4 | $1.6 \times 10^{-3}$ |
| PA2404 | FpvH                                                           | -2.4 | $2.6 \times 10^{-3}$ |
| PA2405 | FpvJ                                                           | -2.8 | $5.9 \times 10^{-3}$ |
| PA2407 | FpvC                                                           | -2.3 | $4.3 \times 10^{-3}$ |
| PA2408 | FpvD                                                           | -3.2 | $5.8 \times 10^{-4}$ |
| PA2409 | FpvE                                                           | -2.1 | $9.6 \times 10^{-3}$ |
| PA2410 | FpvF                                                           | -2.9 | $1.4 \times 10^{-3}$ |
| PA2411 | Thioesterase                                                   | -3.7 | $7.4 \times 10^{-4}$ |
| PA2412 | MbtH-like, a nonribosomal peptide synthetase partner domain    | -3.3 | $2.8 \times 10^{-3}$ |
| PA2413 | L-2,4-diaminobutyrate:2-ketoglutarate 4-aminotransferase, PvdH | -6.3 | $8.0 \times 10^{-4}$ |
| PA2415 | Hypothetical protein                                           | -2.6 | $9.1 \times 10^{-3}$ |
| PA2424 | PvdL                                                           | -7.1 | $7.5 \times 10^{-4}$ |
| PA2425 | PvdG                                                           | -7.5 | $4.7 \times 10^{-4}$ |
| PA2427 | hypothetical protein                                           | -5.0 | $9.2 \times 10^{-4}$ |
| PA2451 | Putative esterase                                              | -4.6 | $5.4 \times 10^{-5}$ |
| PA2452 | Putative esterase                                              | -4.2 | $1.4 \times 10^{-2}$ |

---

|        |                                                               |      |                      |
|--------|---------------------------------------------------------------|------|----------------------|
| PA2467 | Anti-sigma factor FoxR                                        | -2.6 | $1.2 \times 10^{-3}$ |
| PA2468 | ECF sigma factor FoxI                                         | -2.1 | $4.1 \times 10^{-2}$ |
| PA2572 | Two-component response regulator                              | -2.1 | $2.9 \times 10^{-3}$ |
| PA2573 | Chemotaxis transducer                                         | -2.7 | $8.6 \times 10^{-6}$ |
| PA2746 | Conserved hypothetical protein                                | -2.9 | $1.5 \times 10^{-2}$ |
| PA2786 | With GAF domain, putative photosensitive histidine kinase     | -3.0 | $5.0 \times 10^{-2}$ |
| PA2937 | Hypothetical protein                                          | -2.0 | $1.2 \times 10^{-2}$ |
| PA3040 | Hypothetical protein                                          | -2.1 | $1.8 \times 10^{-5}$ |
| PA3409 | HasS, putative anti-sigma factor                              | -3.0 | $1.7 \times 10^{-3}$ |
| PA3418 | Leucine dehydrogenase                                         | -2.1 | $2.5 \times 10^{-2}$ |
| PA3451 | Hypothetical protein                                          | -2.1 | $3.3 \times 10^{-2}$ |
| PA3688 | Hypothetical protein                                          | -2.1 | $2.5 \times 10^{-2}$ |
| PA3691 | DUF4398 domain-containing protein                             | -2.2 | $2.2 \times 10^{-2}$ |
| PA3692 | Lipotoxin F, LptF                                             | -2.3 | $1.5 \times 10^{-2}$ |
| PA3712 | Hypothetical protein                                          | -2.8 | $7.0 \times 10^{-4}$ |
| PA3866 | Pyocin S4                                                     | -2.6 | $3.2 \times 10^{-2}$ |
| PA3900 | FecR, anti-sigma regulator                                    | -2.4 | $1.1 \times 10^{-2}$ |
| PA4168 | Second ferric pyoverdine receptor FpvB                        | -3.3 | $9.5 \times 10^{-4}$ |
| PA4227 | Transcriptional regulator PchR                                | -2.4 | $2.6 \times 10^{-2}$ |
| PA4296 | Two-component response regulator, PprB                        | -2.0 | $2.0 \times 10^{-3}$ |
| PA4390 | Putative outer membrane porin                                 | -2.8 | $8.7 \times 10^{-3}$ |
| PA4467 | Putative metal transporter                                    | -5.8 | $1.2 \times 10^{-3}$ |
| PA4468 | Superoxide dismutase                                          | -3.7 | $4.4 \times 10^{-3}$ |
| PA4469 | A TPR-repeat protein                                          | -3.2 | $2.4 \times 10^{-2}$ |
| PA4471 | Hypothetical protein                                          | -4.2 | $4.5 \times 10^{-2}$ |
| PA4570 | Hypothetical protein                                          | -3.7 | $3.7 \times 10^{-3}$ |
| PA4607 | Hypothetical protein                                          | -2.5 | $1.2 \times 10^{-2}$ |
| PA4614 | Conductance mechanosensitive channel                          | -2.1 | $3.2 \times 10^{-2}$ |
| PA4710 | Heme/Hemoglobin uptake outer membrane receptor PhuR precursor | -5.3 | $1.5 \times 10^{-3}$ |
| PA4895 | Transmembrane sensor                                          | -2.2 | $3.0 \times 10^{-2}$ |
| PA4896 | Sigma-70 factor, ECF subfamily                                | -2.8 | $2.1 \times 10^{-2}$ |
| PA5150 | Short-chain dehydrogenase                                     | -2.3 | $8.1 \times 10^{-3}$ |
| PA5173 | Carbamate kinase                                              | -2.3 | $9.5 \times 10^{-4}$ |
| PA5178 | Putative potassium binding protein                            | -2.2 | $9.3 \times 10^{-3}$ |
| PA5424 | Hypothetical protein                                          | -2.4 | $2.4 \times 10^{-3}$ |
| PA5528 | Hypothetical protein                                          | -2.5 | $7.6 \times 10^{-3}$ |

---
